# Supplementary material for: Identification and Quantification of a Phytotoxic Metabolite from Alternaria dauci
Source: PubMed Central journal article supplement (PMC7504779; doi:10.3390/molecules25174003), 2020-09-02
Supplement: molecules-25-04003-s001.pdf [file molecules-25-04003-s001.pdf]

# Identification and quantification of a phytotoxic metabolites from *Alternaria dauci*

Martha Leyte-Lugo <sup>1,\*</sup>, Pascal Richomme <sup>2</sup>, Pascal Poupard <sup>3</sup> and Luis M. Peña-Rodríguez <sup>1,\*</sup>

<sup>1</sup> Unidad de Biotecnología, Centro de Investigación Científica de Yucatán, 97205, Mérida, Yucatán, Mexico

<sup>2</sup> UPRES EA921SONAS, SFR 4207 QUASAV, Université d'Angers, Angers, 49045, France; pascal.richomme@univ-angers.fr

<sup>3</sup> UMR 1345 IRHS, SFR 4207 QUASAV, INRAE, Institut Agro, Université d'Angers, Angers, 49045, France; pascal.poupard@univ-angers.fr

\* Correspondence: lmanuel@cicy.mx (L.M.P.-R.); mleyte@correo.xoc.uam.mx (M.L.-L.); Tel.: +52-9998-990767(L.M.P.-R.); Tel.: +52-5529-631088 (M.L.-L.)

Academic Editor: Francisco Leon

Received: 20 August 2020; Accepted: 1 September 2020; Published: date

## Table of contents

|                                                                                                                                                                                      | Page |
|--------------------------------------------------------------------------------------------------------------------------------------------------------------------------------------|------|
| <b>Table S1.</b> Regression equations, linear ranges, LOQs, LODs, and precision for quantitative analysis.                                                                           | 2    |
| <b>Table S2.</b> Average recovery of the phytotoxins quantified in <i>A. dauci</i> organic fractions.                                                                                | 2    |
| <b>Figure S1.</b> Production kinetics of <b>a</b> ) $\alpha$ -acetylorscinol ( <b>1</b> ) and <b>b</b> ) <i>p</i> -hydroxybenzoic acid ( <b>2</b> ) in cultures of <i>A. dauci</i> . | 3    |
| <b>Figure S2.</b> <sup>1</sup> H NMR spectrum (600 MHz, CD <sub>3</sub> OD) of $\alpha$ -acetylorscinol ( <b>1</b> ).                                                                | 3    |
| <b>Figure S3.</b> <sup>13</sup> C NMR spectrum (150 MHz, CD <sub>3</sub> OD) of $\alpha$ -acetylorscinol ( <b>1</b> ).                                                               | 4    |
| <b>Figure S4.</b> IR spectrum of $\alpha$ -acetylorscinol ( <b>1</b> ).                                                                                                              | 4    |
| <b>Figure S5.</b> <sup>1</sup> H NMR spectrum (600 MHz, CD <sub>3</sub> OD) of <i>p</i> -hydroxybenzoic acid ( <b>2</b> ).                                                           | 5    |
| <b>Figure S6.</b> <sup>13</sup> C NMR spectrum (150 MHz, CD <sub>3</sub> OD) of <i>p</i> -hydroxybenzoic acid ( <b>2</b> ).                                                          | 5    |
| <b>Figure S7.</b> IR spectrum of <i>p</i> -hydroxybenzoic acid ( <b>2</b> ).                                                                                                         | 6    |
| <b>Figure S8.</b> <sup>1</sup> H NMR spectrum (600 MHz, CDCl <sub>3</sub> ) of O,O-dimethyl- $\alpha$ -acetylorscinol.                                                               | 6    |
| <b>Figure S9.</b> IR spectrum of O,O-dimethyl- $\alpha$ -acetylorscinol.                                                                                                             | 7    |

**Table S1.** Regression equations, linear ranges, LOQs, LODs, and precision for quantitative analysis.

| Phytotoxin                    | Regression equation <sup>a</sup> | Linear range<br>(mg/mL) | $r^2$  | LOQ<br>(mg/mL) | LOD<br>(mg/mL) | Precision RSD <sup>b</sup> (%) |          |
|-------------------------------|----------------------------------|-------------------------|--------|----------------|----------------|--------------------------------|----------|
|                               |                                  |                         |        |                |                | Intraday                       | Interday |
| $\alpha$ -acetylcholinol      | $y = 70806095.0x - 3993858.9$    | 0.1 – 0.5               | 0.9966 | 0.05           | 0.02           | 0.83                           | 0.58     |
| <i>p</i> -hydroxybenzoic acid | $y = 62420155.9x - 1823036.0$    | 0.05 – 0.5              | 0.9971 | 0.04           | 0.01           | 1.68                           | 0.87     |

<sup>a</sup>In the regression equation  $y = mx + b$ ,  $x$  refers to the concentration of standards (mg/mL),  $y$  the peak area.

<sup>b</sup>RSD (%) = (SD/mean)  $\times$  100

$r^2$  is the correlation coefficient; LOD is the limit of detection; LOQ, is the limit of quantification.

**Table S2.** Average recovery of the phytotoxins quantified in *A. dauci* organic fractions.

| Phytotoxin                    | Amount added<br>(mg/mL) | Amount found<br>(mg/mL) | Average recovery<br>(%) | RSD <sup>a</sup> (%) |
|-------------------------------|-------------------------|-------------------------|-------------------------|----------------------|
| $\alpha$ -acetylcholinol      | 0.20                    | 0.20                    | 99.67                   | 0.92                 |
|                               | 0.30                    | 0.30                    | 100.21                  | 1.46                 |
|                               | 0.40                    | 0.40                    | 100.95                  | 0.32                 |
| <i>p</i> -hydroxybenzoic acid | 0.05                    | 0.05                    | 100.77                  | 1.10                 |
|                               | 0.10                    | 0.10                    | 100.91                  | 0.66                 |
|                               | 0.20                    | 0.20                    | 99.54                   | 1.05                 |

<sup>a</sup>RSD (%) = (SD/mean)  $\times$  100.

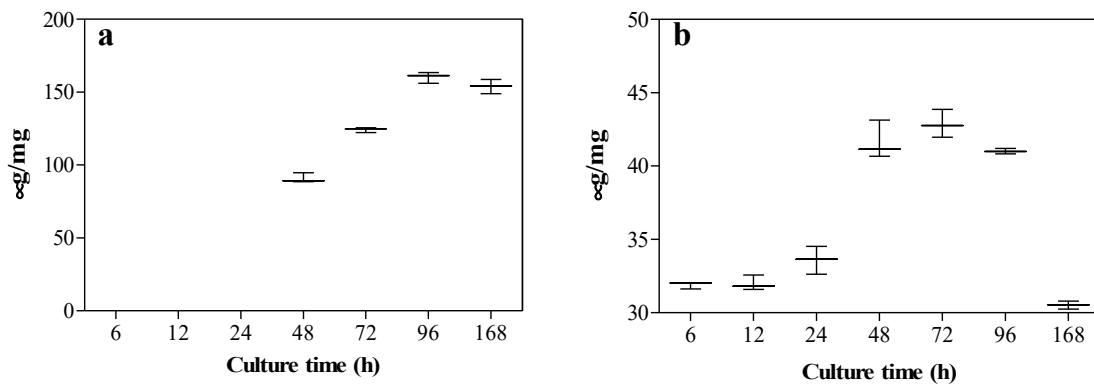

**Figure S1.** Production kinetics of **a)**  $\alpha$ -acetylorscinol (**1**) and **b)** *p*-hydroxybenzoic acid (**2**) in cultures of *A. dauci*.

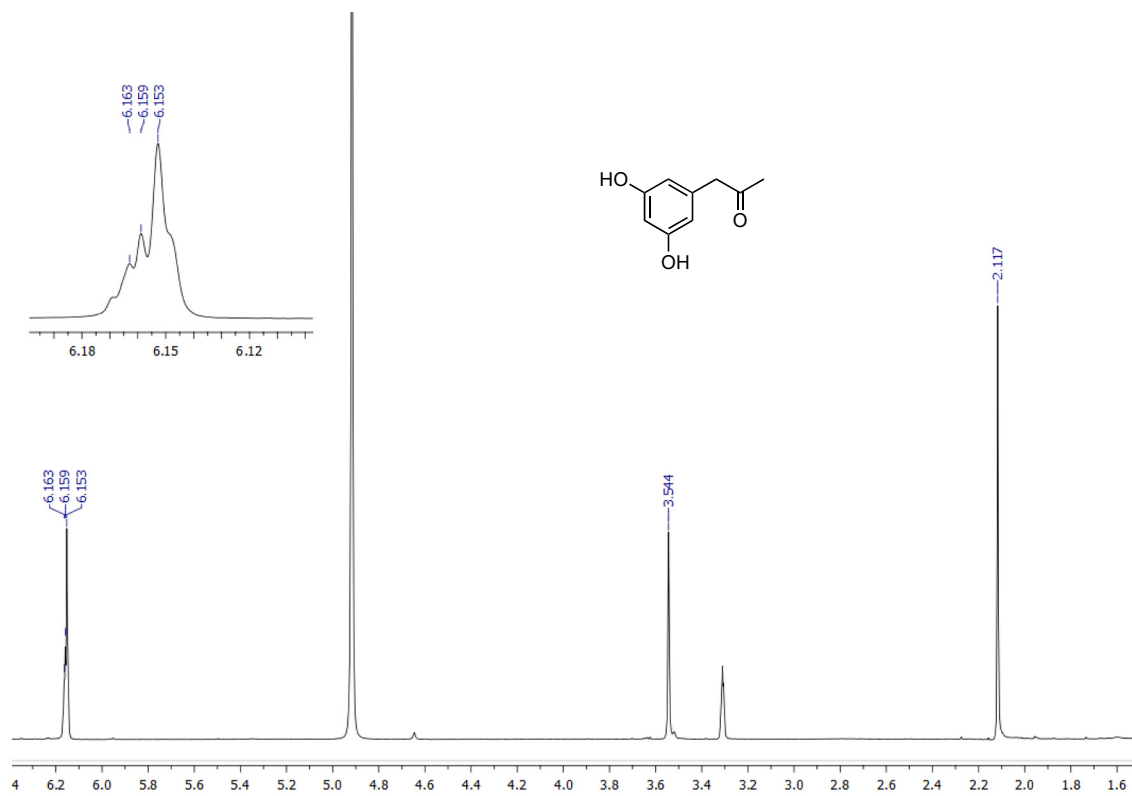

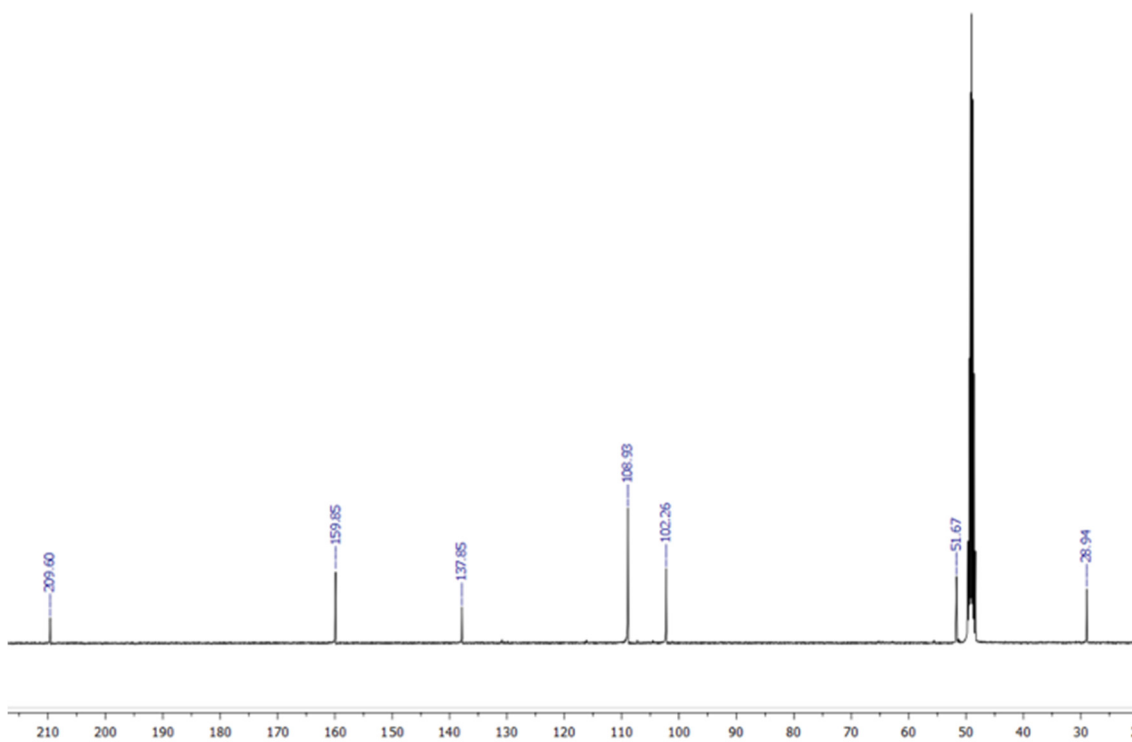

Figure S3. <sup>13</sup>C NMR spectrum (150 MHz, CD<sub>3</sub>OD) of  $\alpha$ -acetylornicinol (**1**).

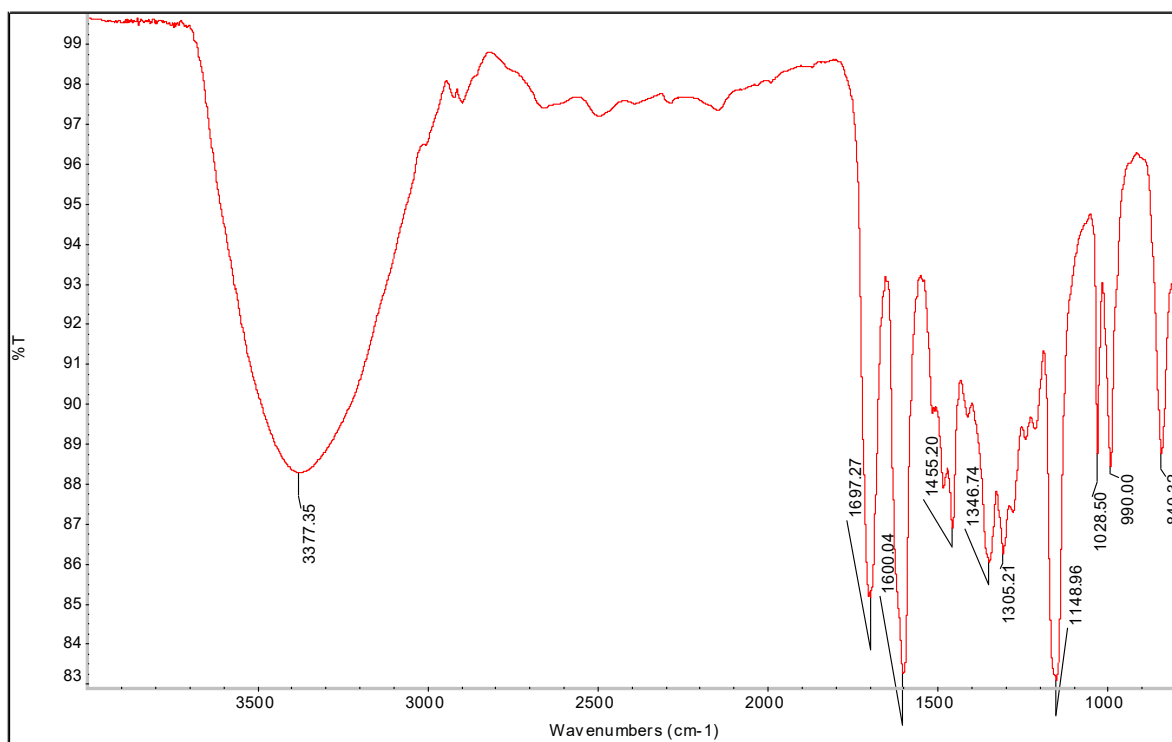

Figure S4. IR spectrum of  $\alpha$ -acetylornicinol (**1**)

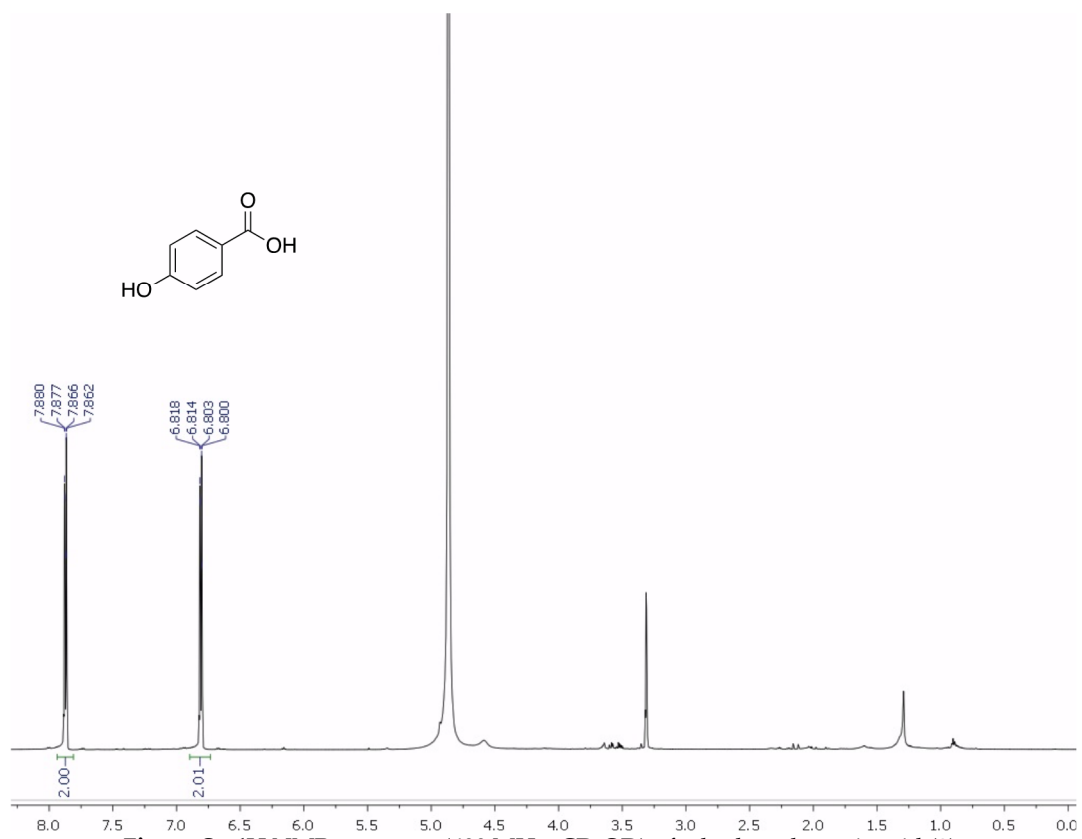

Figure S5. <sup>1</sup>H NMR spectrum (600 MHz, CD<sub>3</sub>OD) of *p*-hydroxybenzoic acid (2).

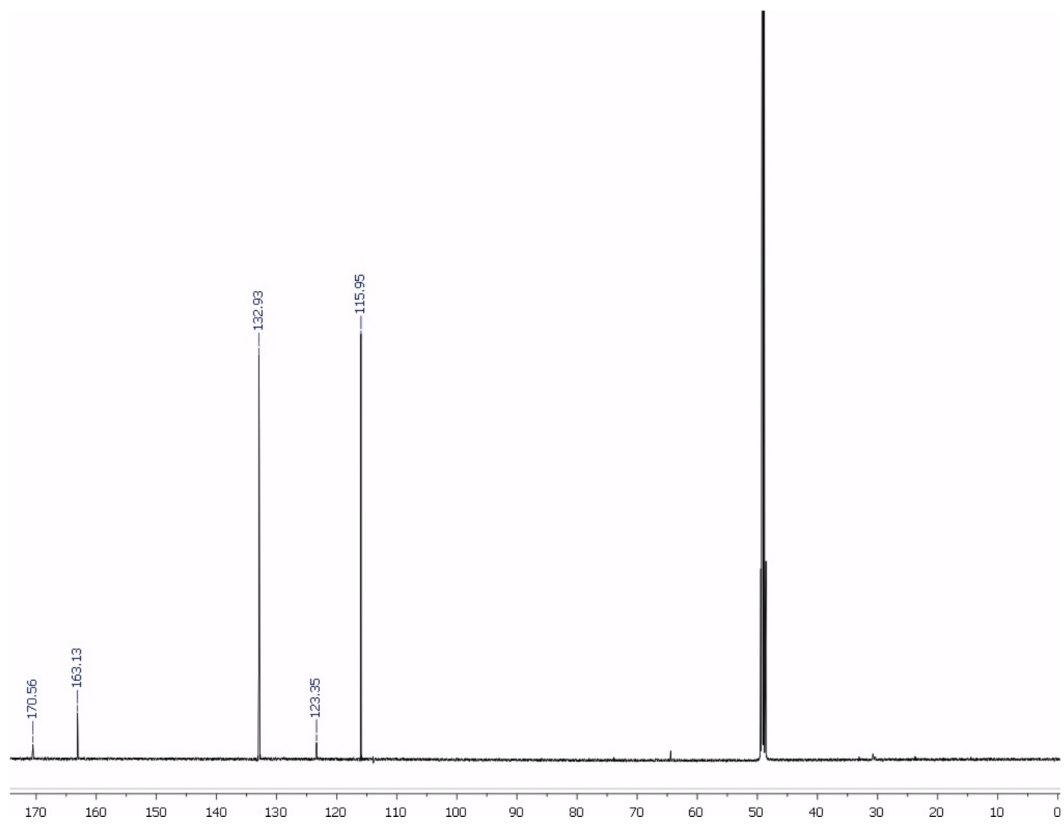

Figure S6. <sup>13</sup>C NMR spectrum (150 MHz, CD<sub>3</sub>OD) of *p*-hydroxybenzoic acid (2).

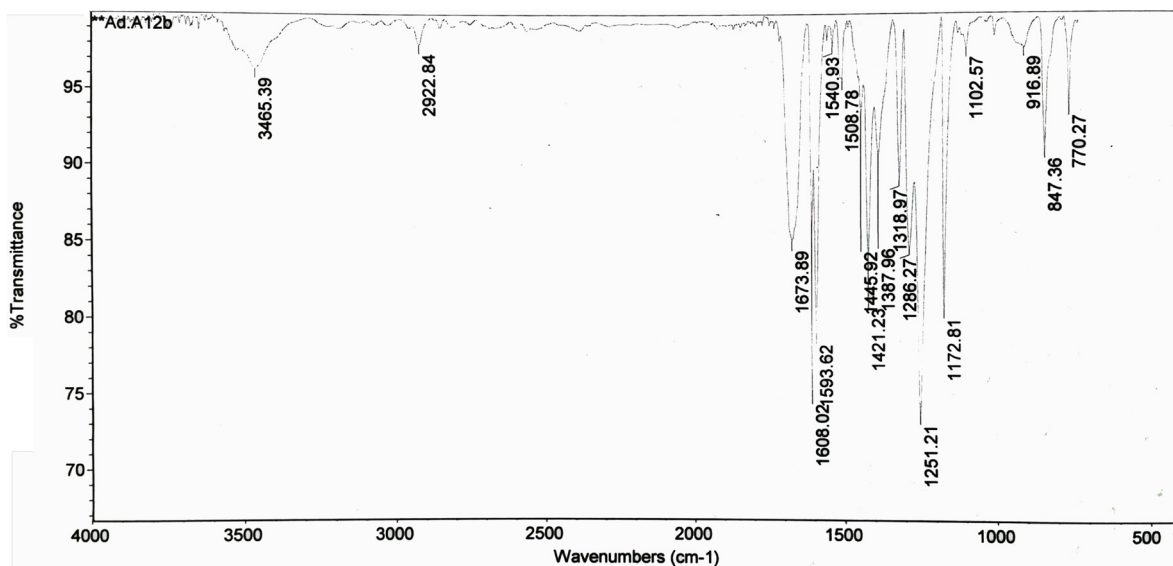

Figure S7. IR spectrum of *p*-hydroxybenzoic acid (2).

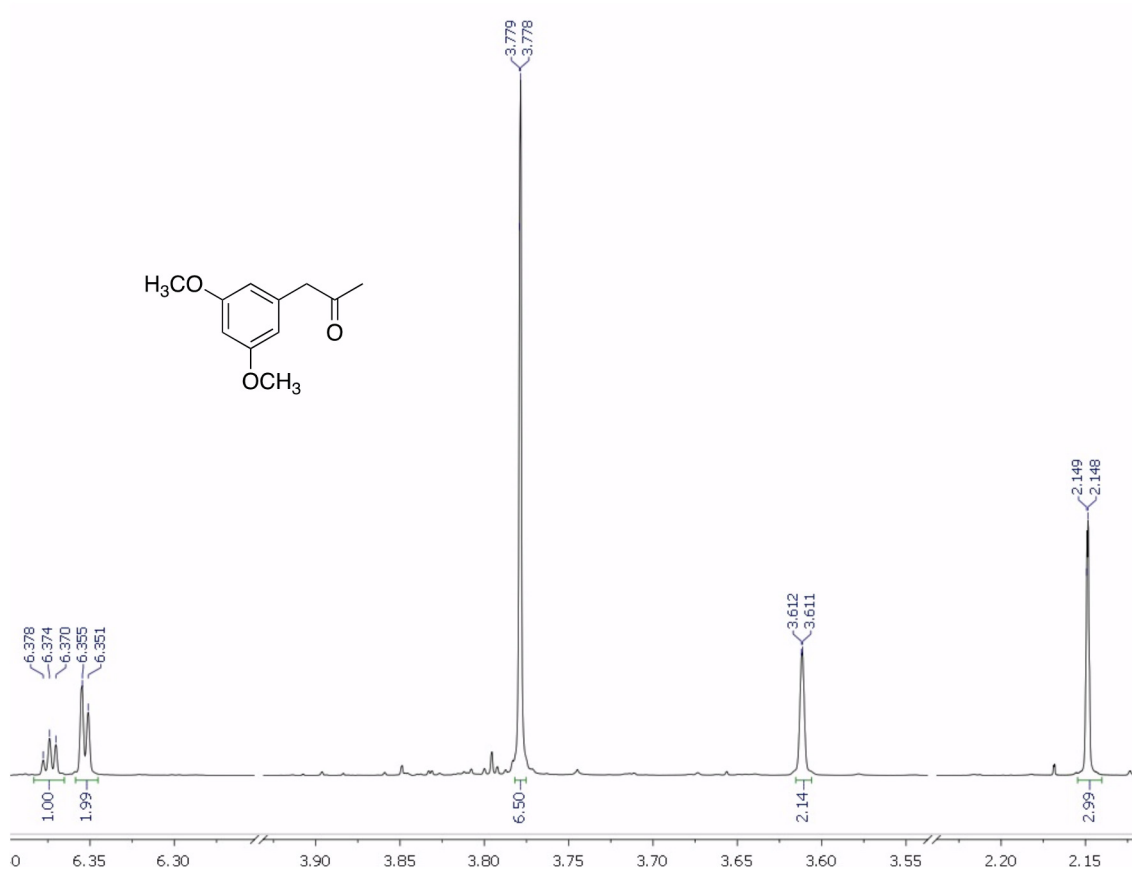

Figure S8. <sup>1</sup>H NMR spectrum (600 MHz, CDCl<sub>3</sub>) of O,O-dimethyl- $\alpha$ -acetylornicinol.

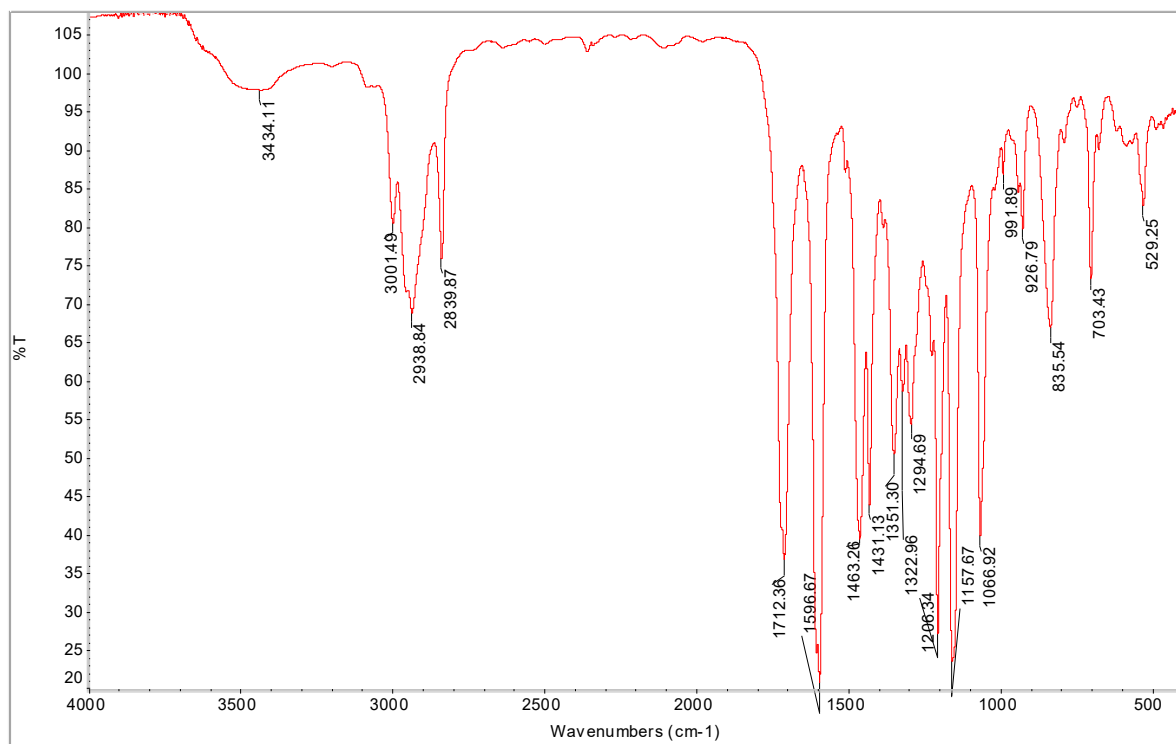

Figure S9. IR spectrum of O,O-dimethyl- $\alpha$ -acetylornicinol.
